# Supplementary material for: Drosophila Rab39 Attenuates Lysosomal Degradation
Source: MDPI journal article supplement (doi:10.3390/ijms221910635), 2021-09-30
Supplement: s1 [file s1]

## Supplementary figure legends

Supplementary figure S1. Early endosomal distribution is unaltered in Rab39 mutant nephrocytes. (A-B) Early endosomal Rab5 was marked by immunostaining both in control (A) and Rab39C-R (B) garland nephrocytes with no difference in vesicle size or distribution.

Supplementary figure S2. Statistical analysis of experiments depicted in Fig. 4. From left to right: number of 3xmCherry-Atg8a dots per cell in starved larvae (non-Gaussian), size of 3xmCherry-Atg8a dots in starved larvae (non-Gaussian), number of 3xmCherry-Atg8a dots per cell in wandering larvae (non-Gaussian), size of 3xmCherry-Atg8a dots in wandering larvae (non-Gaussian), size of dLAMP-3xmCherry dots in starved larvae (Gaussian), size of 3xmCherry-Atg8a dots in starved larvae (Gaussian). In all cases  $n = 10$  cells. Medians are shown as horizontal black lines within the boxes. Bars show the upper and lower quartiles, and the whiskers plot the smallest and largest observations. \*\*  $p < 0.01$  \*\*\*  $p < 0.001$ .
